# Supplementary material
Source: Elsevier journal article supplement (https://cris.unibo.it/retrieve/16725864-a826-499c-8664-09b62c3afbbd/mmc1.docx)
Supplement: mmc1 [file mmc1.docx]

**Supplementary figures and legends**

**Figure S1. Academic genomic HRD test and RAD51 are feasible in ovarian cancer samples.** A) Summary of the evaluable cases for genomic HRD test and/or RAD51 test and/or miR-506 expression in MITO16a concordance analyses. B) Causes of failure rate for RAD51 assay in MITO16a concordance analyses.

**Figure S2. High relative expression of miR-506 correlates with HRD status and favorable prognosis.** A) Preliminary analysis correlating the relative expression of miR-506 with the HRR status as defined by the academic genomic test (n=72 - Unpaired t test). B) Kaplan–Meier curves for Progression Free Survival (PFS) of 140 OC patients stratified for miR-506 relative expression (upper quartile vs. others). In the inset relative expression of miR-506 n all cases. C and D) Relative expression of miR-506 in MITO16A cases with evaluable HRR status as defined by the academic genomic (C) test and by RAD51 assay (D); only cases with relative miR-506 expression above median expression were considered. HRP: homologous recombination proficient; HRD: homologous recombination deficient.

**Figure S3. Genomic and functional HRD, and miR-506 expression in *BRCA1/2* WT population.** A) HRD status in *BRCA1/2* WT population according to genomic and functional testing. B) Percentage of HRD and Neg-HRD tumors by genomic testing among RAD51 assay HRD and HRP samples. C) miR-506 distribution in HRD and Neg-HRD samples by genomic assay. D) miR-506 distribution in HRD and HRP samples by RAD51 assay.


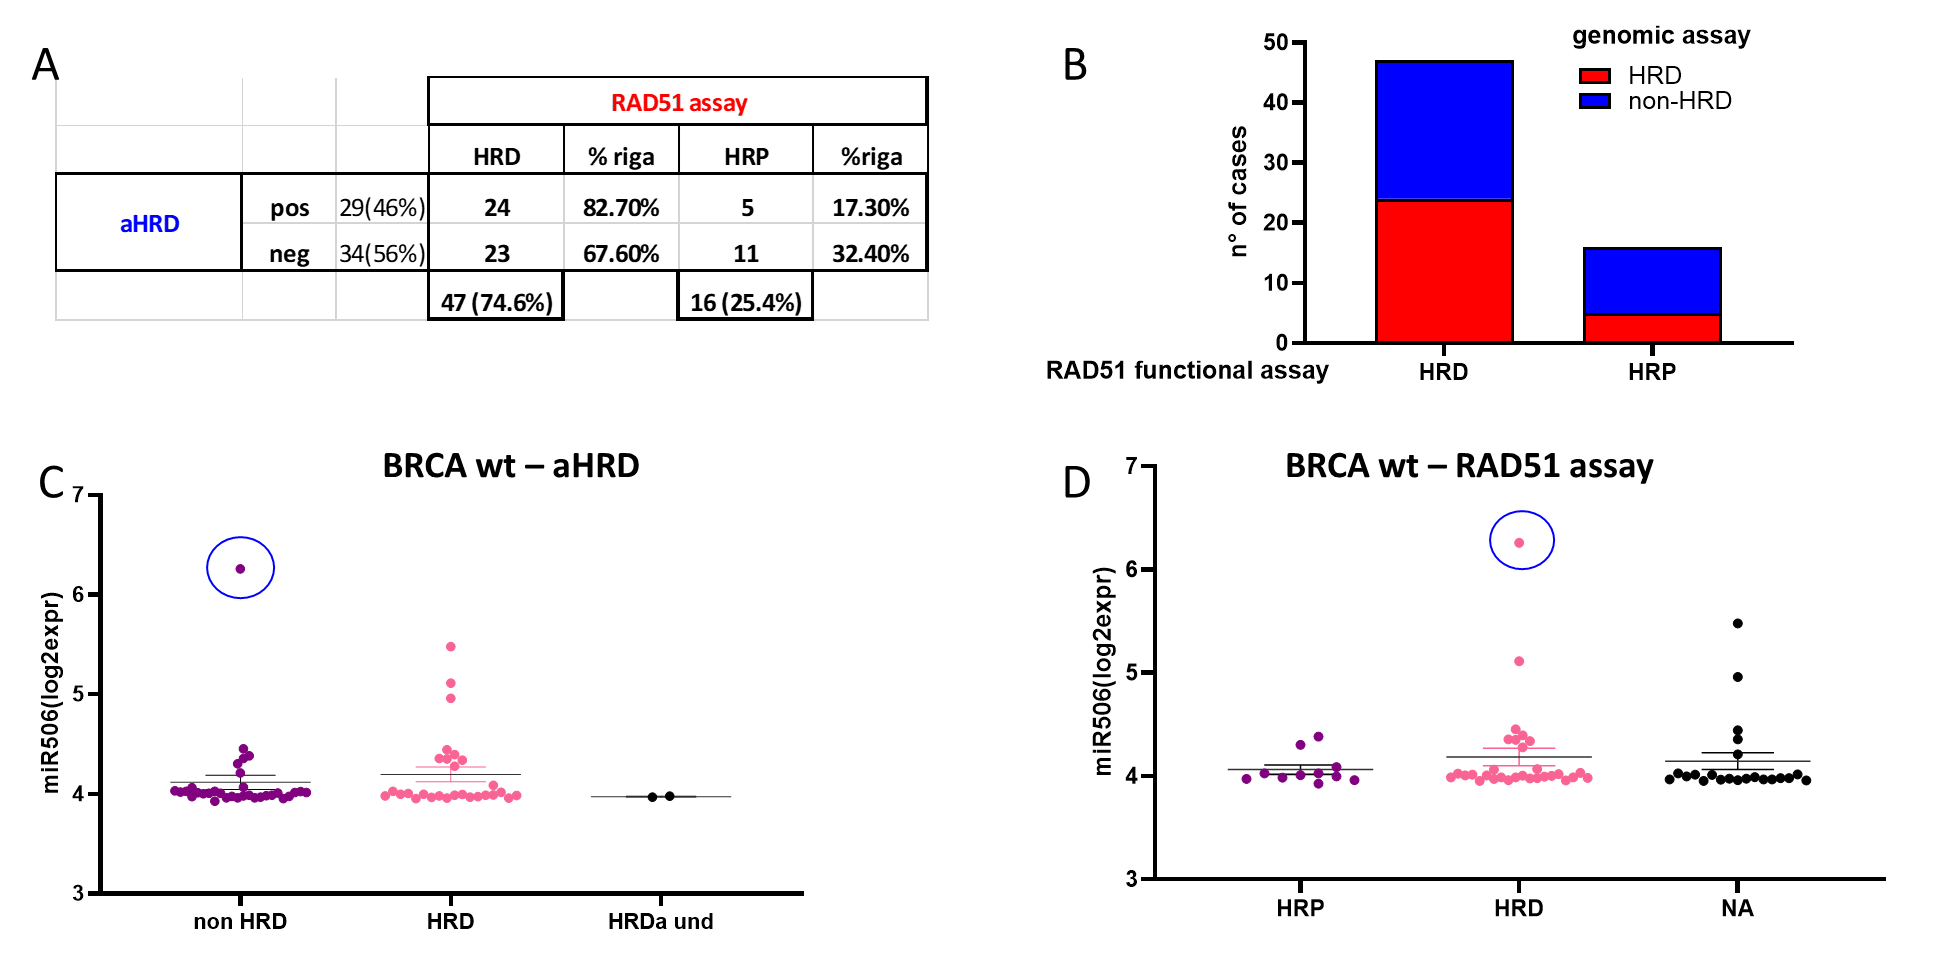


**Supplementary Tables**

**Table S1. Clinical-pathological characteristic of the population in analysis compared to the MITO16A enrolled patients**

**Table S2. Comparison between Genomic and Functional HRD in MITO16A concordance analyses.**

A) Functional HRD by RAD51 and Genomic HRD classified in to two groups (HRD vs Neg-HRD). B) Functional HRD by RAD51 and Genomic HRD classified in to three groups (High-HRD, Medium-HRD vs Neg-HRD).

**Table S3. Comparison between Genomic and Functional HRD in MITO16A concordance analyses within samples in upper quartile of miR-506 relative expression.**

Functional HRD by RAD51 assay and Genomic HRD classified into two groups (HRD vs Neg-HRD).
